# Supplementary material for: Glycerol-3-Phosphate Acyltransferase 3 (OsGPAT3) is required for anther development and male fertility in rice
Source: PubMed Central journal article supplement (PMC6055571; doi:10.1093/jxb/erw445), 2017-01-12
Supplement: erw445_suppl_supplementary_figures_s1_s3_table_s1.pdf [file erw445_suppl_supplementary_figures_s1_s3_table_s1.pdf]

# **Glycerol-3-Phosphate Acyltransferase 3 (OsGPAT3) is required for anther development and male fertility in rice**

## **Authors:**

Xiao Men, Jianxin Shi, Wanqi Liang, Qianfei Zhang, Gaibin Lian, Sheng Quan, Lu Zhu, Zhijing Luo, Mingjiao Chen, and Dabing Zhang

**Figure S1.** The ratio of weight/surface area of the anthers in the wild type and *osgp3* mutant.

**Figure S2.** Expression patterns of *OsGPAT3* in wild type anthers. A, GUS staining of *ProGPAT3:GUS* spikelets at different stages. Bars = 2 mm. B, Heatmap expression data of *OsGPAT3*, *DPW*, *CYP704B2*, *CYP703A3* and *LOC\_Os01g63580*, a homolog of *AtGPAT6*, during anther development (Affymetrix GSE 13988, Rice Oligonucleotide Array Database: <http://www.ricearray.org>). An1, hypodermal archesporial cells forming stage; Mei1, pollen mother cells at pre-meiotic S/G2 stage; M1, pollen mother cells at meiotic leptotene stage; M2, pollen mother cells at meiotic zygotene-pachytene stage; M3, pollen mother cells at meiotic diplotene-tetrad stage; P1, uni-nucleated gametocyte stage; P2, bi-cellular gametocyte stage; P3, tri-cellular mature pollen stage.

**Figure S3.** Transmission electron microscopy analysis of tapetal cells development in the wild type and *osgp3* mutant at stage 8. A-D, tapetal cells of the wild type at stage 8. E-H, tapetal cells of the *osgp3* mutant at stage 8. Obviously increased and swollen ER can be observed in the tapetal cells of *osgp3* mutant. N, Nucleus; ER, endoplasmic reticulum. Bars = 1  $\mu\text{m}$  in (A), (C), (E), (G) and 2  $\mu\text{m}$  in (B), (D), (F), (H).

**Table S1.** Primer sequences used in this study.

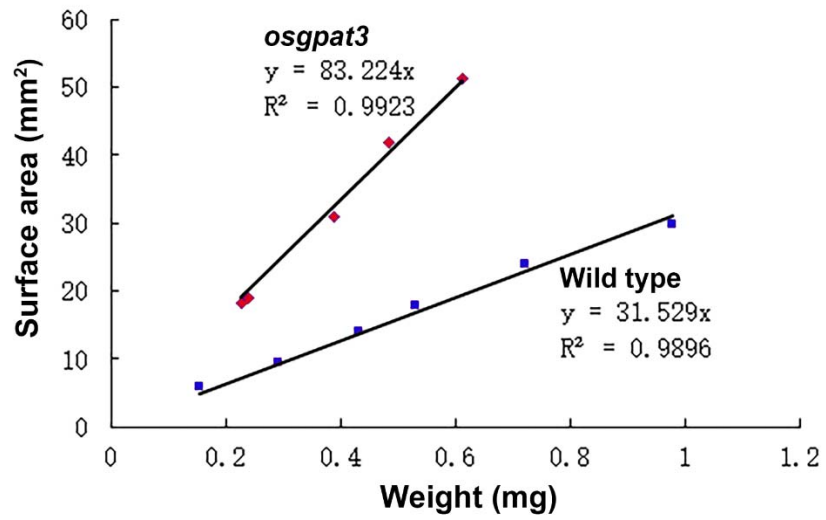

**Figure S1.** The ratio of weight/surface area of the anthers in the wild type and *osgpat3* mutant.

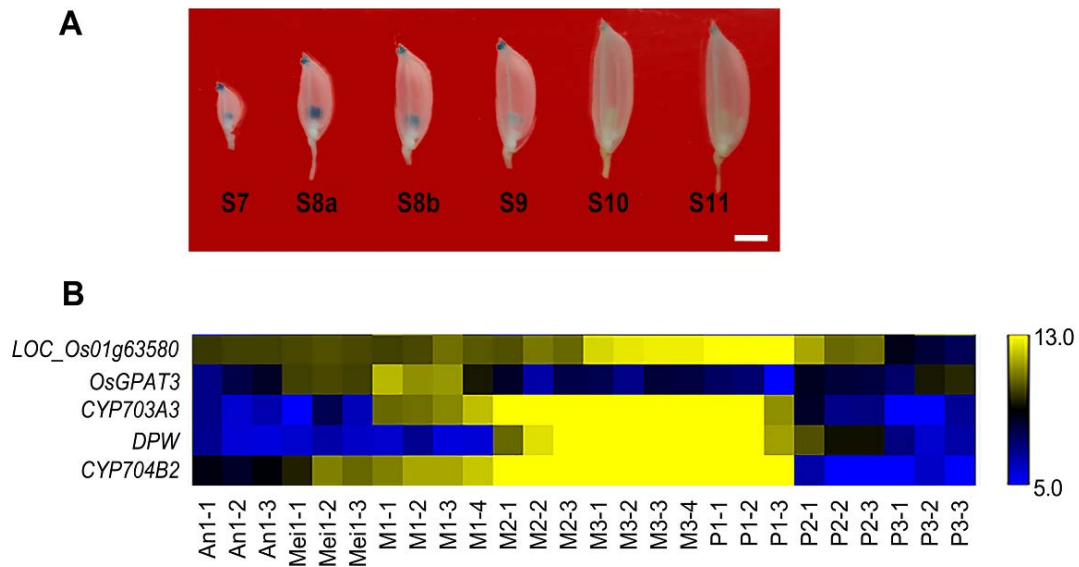

**Figure S2.** Expression patterns of *OsGPAT3* in wild type anthers. A, GUS staining of *ProGPAT3:GUS* spikelets at different stages. Bars = 2 mm. B, Heatmap expression data of *OsGPAT3*, *DPW*, *CYP704B2*, *CYP703A3* and *LOC\_Os01g63580*, a homolog of *AtGPAT6*, during anther development (Affymetrix GSE 13988, Rice Oligonucleotide Array Database: <http://www.ricearray.org>). An1, hypodermal archesporial cells forming stage; Mei1, pollen mother cells at pre-meiotic S/G2 stage; M1, pollen mother cells at meiotic leptotene stage; M2, pollen mother cells at meiotic zygotene-pachytene stage; M3, pollen mother cells at meiotic diplotene-tetrad stage; P1, uni-nucleated gametocyte stage; P2, bi-cellular gametocyte stage; P3, tri-cellular mature pollen stage.

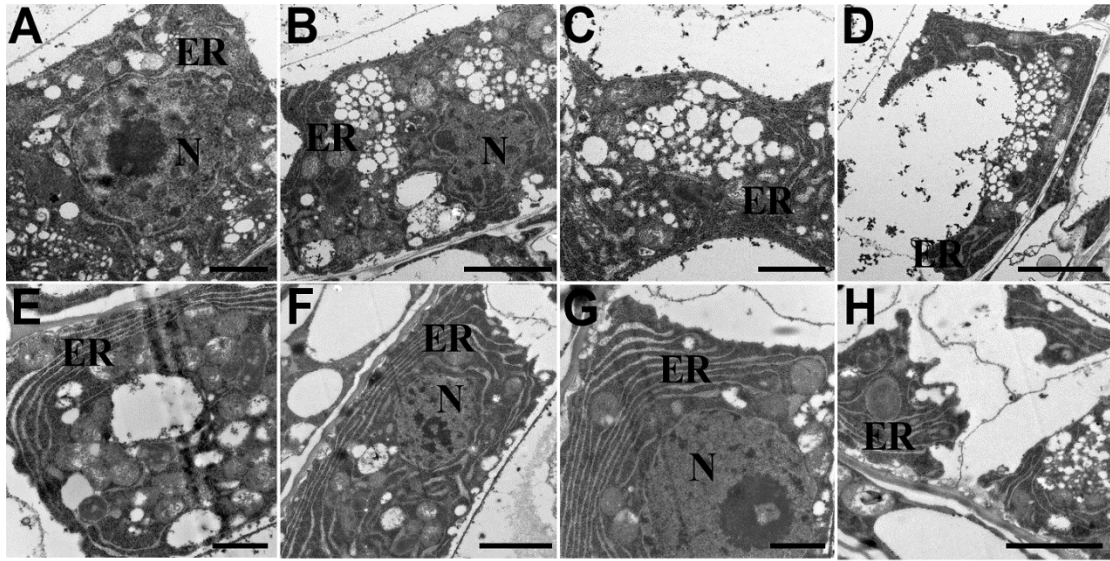

**Figure S3.** Transmission electron microscopy analysis of tapetal cells development in the wild type and *osgpat3* mutant at stage 8. A-D, tapetal cells of the wild type at stage 8. E-H, tapetal cells of the *osgpat3* mutant at stage 8. Obviously increased and swollen ER can be observed in the tapetal cells of *osgpat3* mutant. N, Nucleus; ER, endoplasmic reticulum. Bars = 1  $\mu\text{m}$  in (A), (C), (E), (G) and 2  $\mu\text{m}$  in (B), (D), (F), (H).

**Table S1.** Primer sequences used in this study.

| Primer name         | Sequence (5'-3')                      | Annotation                                  |
|---------------------|---------------------------------------|---------------------------------------------|
| pA7-OsGPAT3-F       | CCCTCGAGATGCCCAAGAAGAAGCTGTCACA       | subcellular-localization                    |
| pA7-(ΔN)OsGPAT3-F   | CCCTCGAGAAGCCTATCTCTAGATCATCATCCAACAC | subcellular-localization                    |
| pA7-OsGPAT3-R       | GGACTAGTACTTGCATCTTCTTCTCCCGGAG       | subcellular-localization                    |
| OsGPAT3pro-F        | CCGAGCTCGACCATATGAGTGCATAGAAATTAATGG  | GUS staining                                |
| OsGPAT3pro-R        | AACCATGGGGATCCGGTGTACTGTTGTTGGTGCAA   | GUS staining                                |
| p1300+OsGPAT3eGFP-F | CGGGATCCATGCCCAAGAAGAAGCTGTCACAT      | complementary expression in <i>osgpatt3</i> |
| p1300+OsGPAT3eGFP-R | GGACTAGTTTGCATCTTCTTCTCCCGGAG         | complementary expression in <i>osgpatt3</i> |
| 2D-41298-F          | CCTCATGTGCATTGCTGTATG                 | genotyping                                  |
| 2D-41298-R          | GGGTTGGCGATGTAGTAGAG                  | genotyping                                  |
| JD-HYG-F            | GATGTTGGCGACCTCGTATT                  | genotyping                                  |
| JD-HYG-R            | GAGCCTGACCTATTGCATCTC                 | genotyping                                  |
| CH1132-F            | ATCGGCTACTCATCCACCT                   | mapping                                     |
| CH1132-R            | TTTTGGGACGAAGGGAG                     | mapping                                     |
| ML2-F               | AGCTGTTACCGCAGTCGA                    | mapping                                     |
| ML2-R               | TGACGTGTGTAATAATTTGTGT                | mapping                                     |
| ML4-F               | GCCTCTGTGATGTTGTCGAG                  | mapping                                     |
| ML4-R               | GGATCAATTGGGAGAAGGTG                  | mapping                                     |
| ML12-F              | GGCTTCTCCTAGGGCTTACT                  | mapping                                     |
| ML12-R              | ACACCAACATGAGAACAACC                  | mapping                                     |
| YUN115.1-F          | TGCGAATTGTTCCGGTTAT                   | mapping                                     |
| YUN115.1-R          | AAATGTCGCATGTAACCACA                  | mapping                                     |
| RM6094-F            | TGCTTGATCTGTGTTTCGTCC                 | mapping                                     |
| RM6094-R            | TAGCAGCACCAGCATGAAAG                  | mapping                                     |
| OsActin-qRT-F       | CGATAACAGCTCCTCTTGGC                  | qRT-PCR                                     |
| OsActin-qRT-R       | GAGATCACTGCCTTGGCTCC                  | qRT-PCR                                     |
| OsGPAT3-qRT-F       | TTCACTGGCATCATGGAGGAGGAA              | qRT-PCR                                     |

| Primer name          | Sequence (5'-3')                              | Annotation            |
|----------------------|-----------------------------------------------|-----------------------|
| OsGPAT3-qRT-R        | AACACCATCGGCTTCGGGTACTT                       | qRT-PCR               |
| DPW-qRT-F            | GTAGTCGGAGATGTCAGAGAAGCC                      | qRT-PCR               |
| DPW-qRT-R            | GATCCCTCCAGGTGCTCTCG                          | qRT-PCR               |
| CYP703A3-qRT-F       | GCTAGGGAGGCCAAGAAGAG                          | qRT-PCR               |
| CYP703A3-qRT-R       | TTGGTCACCGATGATGTGTC                          | qRT-PCR               |
| CYP704B2-qRT-F       | GGCAGAGTTGTAGACATGCA                          | qRT-PCR               |
| CYP704B2-qRT-R       | CGACAGTATGTCGTGCTTGA                          | qRT-PCR               |
| TDR-qRT-F            | GGAGGAGTAACAAGGACCCA                          | qRT-PCR               |
| TDR-qRT-R            | ACCTCCAGCAGCGAGTCCCT                          | qRT-PCR               |
| TIP2-qRT-F           | GTGGAGGACGACGTGAACAT                          | qRT-PCR               |
| TIP2-qRT-R           | CACCACTTCAATCAGCCTGC                          | qRT-PCR               |
| MTR1-qRT-F           | CTCTTTCGTCCTCTGCTTCTAAC                       | qRT-PCR               |
| MTR1-qRT-R           | GGCAGTAGCACGATATGTCATC                        | qRT-PCR               |
| OsGPAT3-in situ-F    | ATCCAACACCAACACCACATTGCC                      | in situ hybridization |
| OsGPAT3-in situ-R    | AGAAGGACACCATTGCCATGACCT                      | in situ hybridization |
| OsGPAT3-in situ T7-F | TAATACGACTCACTATAGGG ATCCAACACCAACACCACATTGCC | in situ hybridization |
| OsGPAT3-in situ T7-R | TAATACGACTCACTATAGGG AGAAGGACACCATTGCCATGACCT | in situ hybridization |
